# Supplementary material for: A Fatty Acid Mouth Rinse Decreases Self-Reported Hunger and Increases Self-Reported Fullness in Healthy Australian Adults: A Randomized Cross-Over Trial
Source: MDPI journal article supplement (doi:10.3390/nu12030678), 2020-03-02

Table S1 – Comparison of appetite rating AUCs between days 1 & 2 and days 3 & 4.

|          | Days 1 & 2<br>mm × hr<br>(95% CI) | Days 3 & 4<br>mm × hr<br>(95% CI) | Difference<br>(95% CI) | Days<br>( <i>p</i> ) | Days ×<br>Treatment<br>( <i>p</i> ) |
|----------|-----------------------------------|-----------------------------------|------------------------|----------------------|-------------------------------------|
| Fullness | 158 (140, 177)                    | 156 (137, 175)                    | -2.43 (-16.0, 11.1)    | 0.723                | 0.198                               |
| Hunger   | 156 (135, 178)                    | 162 (141, 184)                    | 6.23 (-8.00, 20.4)     | 0.385                | 0.662                               |
| Desire   | 161 (134, 188)                    | 174 (147, 201)                    | 13.5 (-1.82, 28.9)     | 0.083                | 0.690                               |
| Quantity | 145 (122, 169)                    | 159 (136, 182)                    | 13.6 (-0.27, 27.5)     | 0.055                | 0.850                               |
| Meal     | 143 (115, 171)                    | 158 (131, 186)                    | 15.3 (-0.61, 31.1)     | 0.059                | 0.672                               |
| Snack    | 215 (182, 249)                    | 228 (195, 261)                    | 12.7 (-4.49, 29.9)     | 0.146                | 0.942                               |

Difference between days calculated as 3&4 – 1&2. Means (95% CIs) and *p*-values were estimated using a linear mixed model including days, treatment, and days × treatment interactions as fixed effects, and participant as a mixed effect to control for duplicate measures of each treatment.

Figure S1. Means and 95% CIs for self-reported appetite ratings in participants (*n* = 31) on days 1 & 2 (ongoing FTT tests) and days 3 & 4 (one initial FTT test) prior to and following mouth rinse treatments over time.

Means and 95% CIs were estimated using a linear mixed model including days, time, and days × time interaction as fixed effects, and participant as a mixed effect to control for duplicate measures of each treatment. A: Fullness ratings; B: Hunger ratings; C: Desire to Eat ratings; D: Quantity of Food that could be Consumed ratings; E: Desire to Eat a Meal ratings; F: Desire to Eat a Snack ratings.

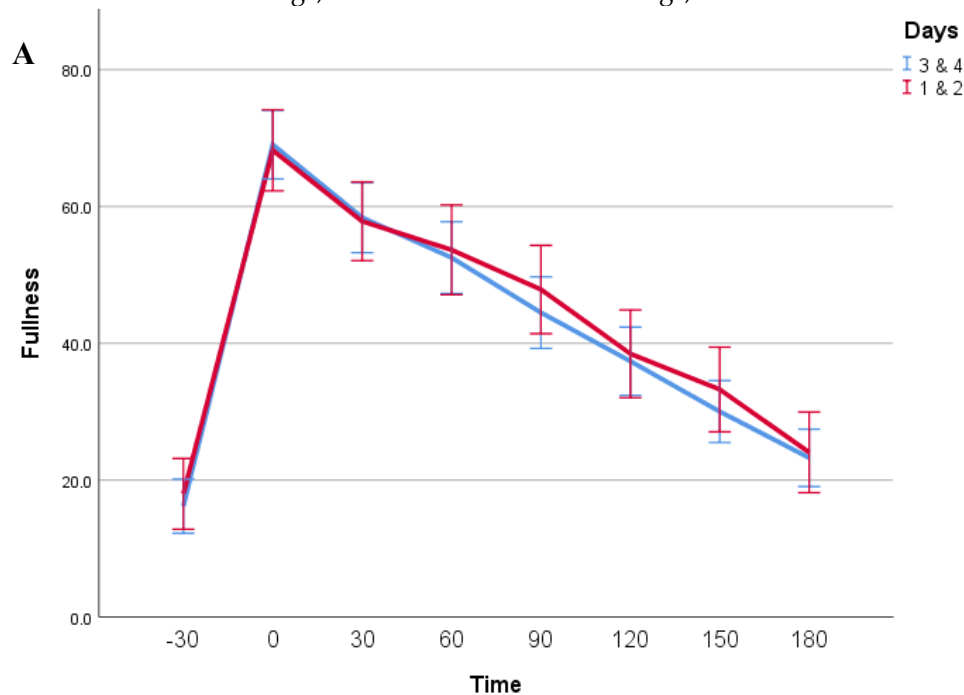

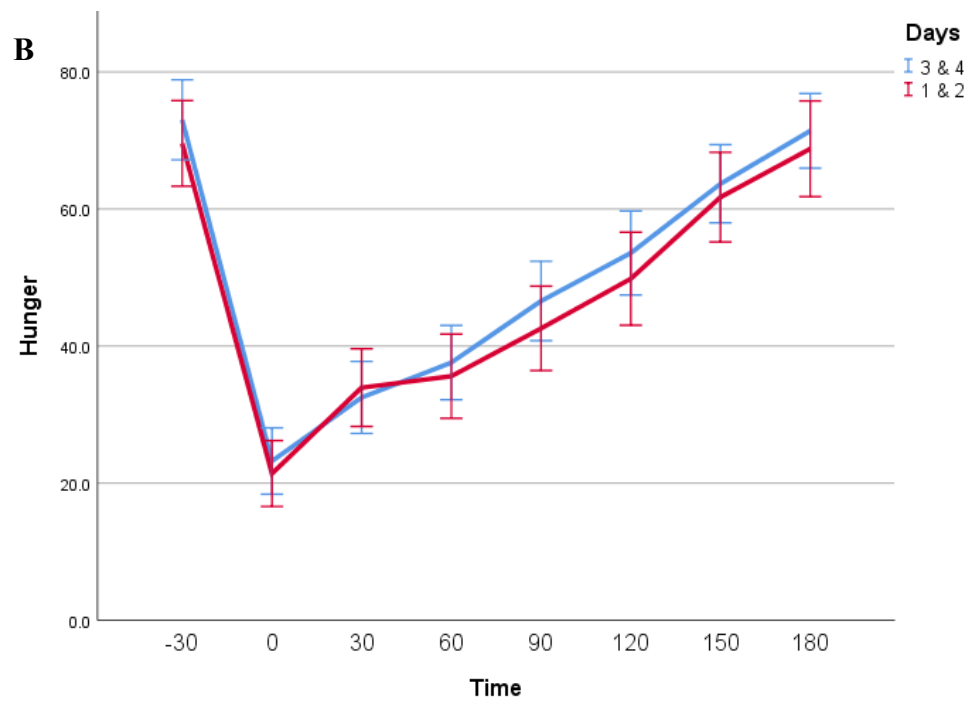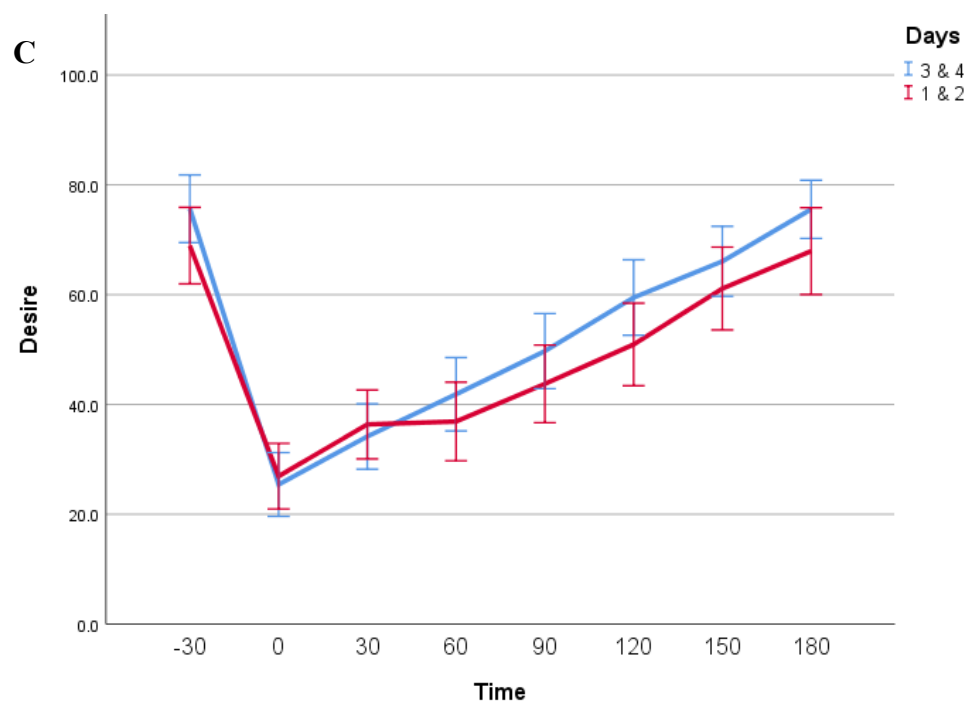

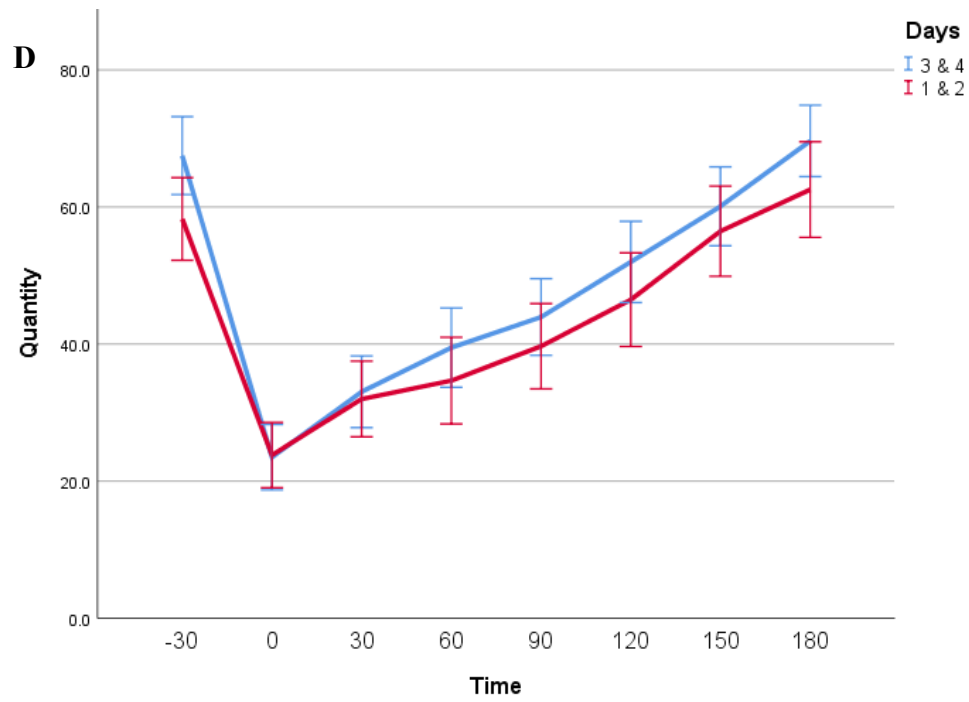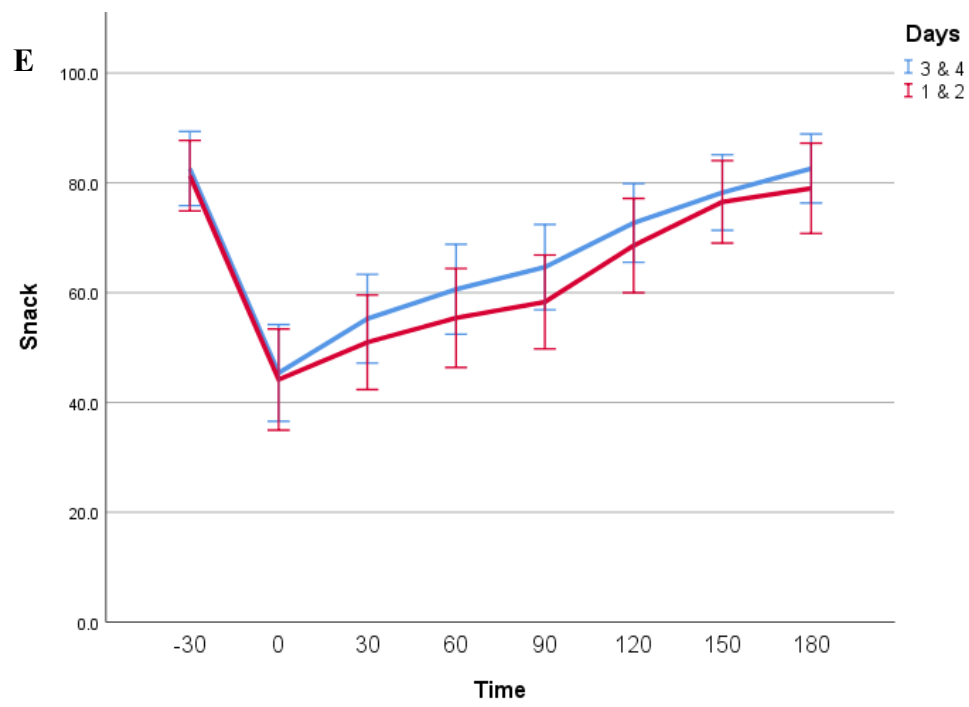

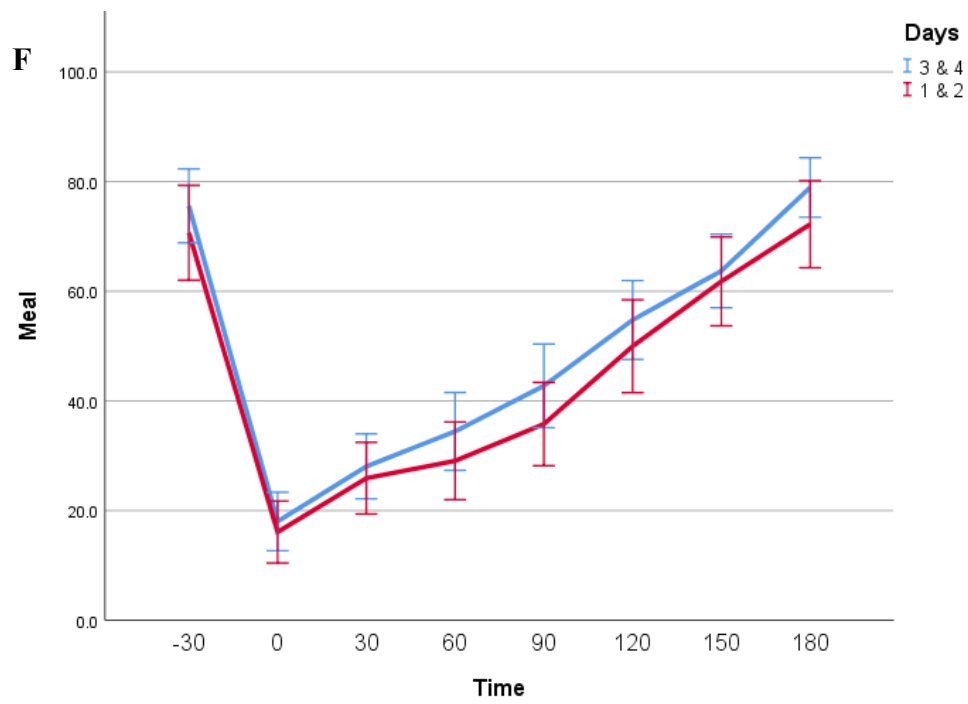

Supplement: s1 [file s1]
