# Supplementary material for: A Fatty Acid Mouth Rinse Decreases Self-Reported Hunger and Increases Self-Reported Fullness in Healthy Australian Adults: A Randomized Cross-Over Trial
Source: MDPI journal article supplement (doi:10.3390/nu12030678), 2020-03-02
Supplement: s1 [file s1]

## Oral Rinse Study Satiety Questionnaire.

For this study, we ask that you complete a Satiety Questionnaire every 30 minutes from the onset of each session. Please answer the questions as accurately as possible. You will be notified via SMS when you need to complete the next questionnaire. Please complete these questionnaires promptly to allow as much time as possible between each questionnaire.

This questionnaire should take you approximately **2 minutes** to complete.

**PRESS THE 'NEXT' BUTTON TO BEGIN**

### SATIETY QUESTIONNAIRE

**Instructions:** For each question, please rate your answer on the scale as accurately as possible. Please complete this questionnaire promptly.

**How full do you feel?**

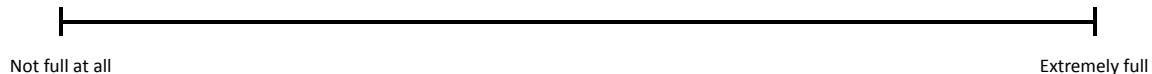

Not full at all

Extremely full

**How hungry are you?**

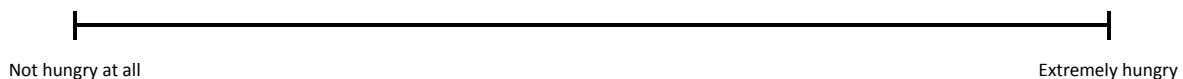

Not hungry at all

Extremely hungry

**How strong is your desire to eat?**



Strong desire not to eat

Strong desire to eat

**How much food could you eat right now?**

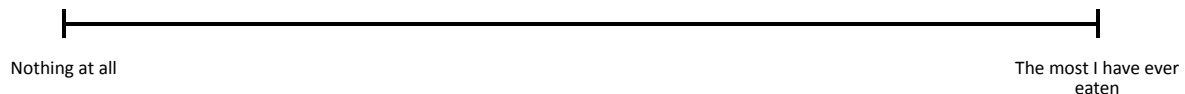

Nothing at all

The most I have ever eaten

**Do you feel you could eat a snack right now?**

I could not eat a snack  
right now

I could eat a snack  
right now

**Do you feel you could eat a full meal right now?**

I could not eat a full  
meal right now

I could eat a full meal  
right now

**Would you like to eat something sweet right now?**

Not at all

Yes, very much

**Would you like to eat something savoury right now?**

Not at all

Yes, very much

**Would you like to eat something fatty right now?**

Not at all

Yes, very much

**Would you like to eat something salty right now?**

Not at all

Yes, very much

# FINISHED!

**PRESS THE 'FINISH' BUTTON TO SUBMIT YOUR RESULTS**

Reminder, you will complete this questionnaire every 30 minutes throughout this session. Please ensure you complete the next questionnaire promptly when notified.  
If you have any questions or concerns, please return to the CASS lab (J1.05) and ring the doorbell to get the attention of the researcher.

Finished
